# Supplementary material for: Comparative Phylogenetic Analysis for Aerides (Aeridinae, Orchidaceae) Based on Six Complete Plastid Genomes
Source: MDPI journal article supplement (doi:10.3390/ijms241512473), 2023-08-05
Supplement: s1 [file s1]

**Supplementary Figure 1.** Phylogenetic analysis of 22 Aeridinae species based on 68 protein coding genes.

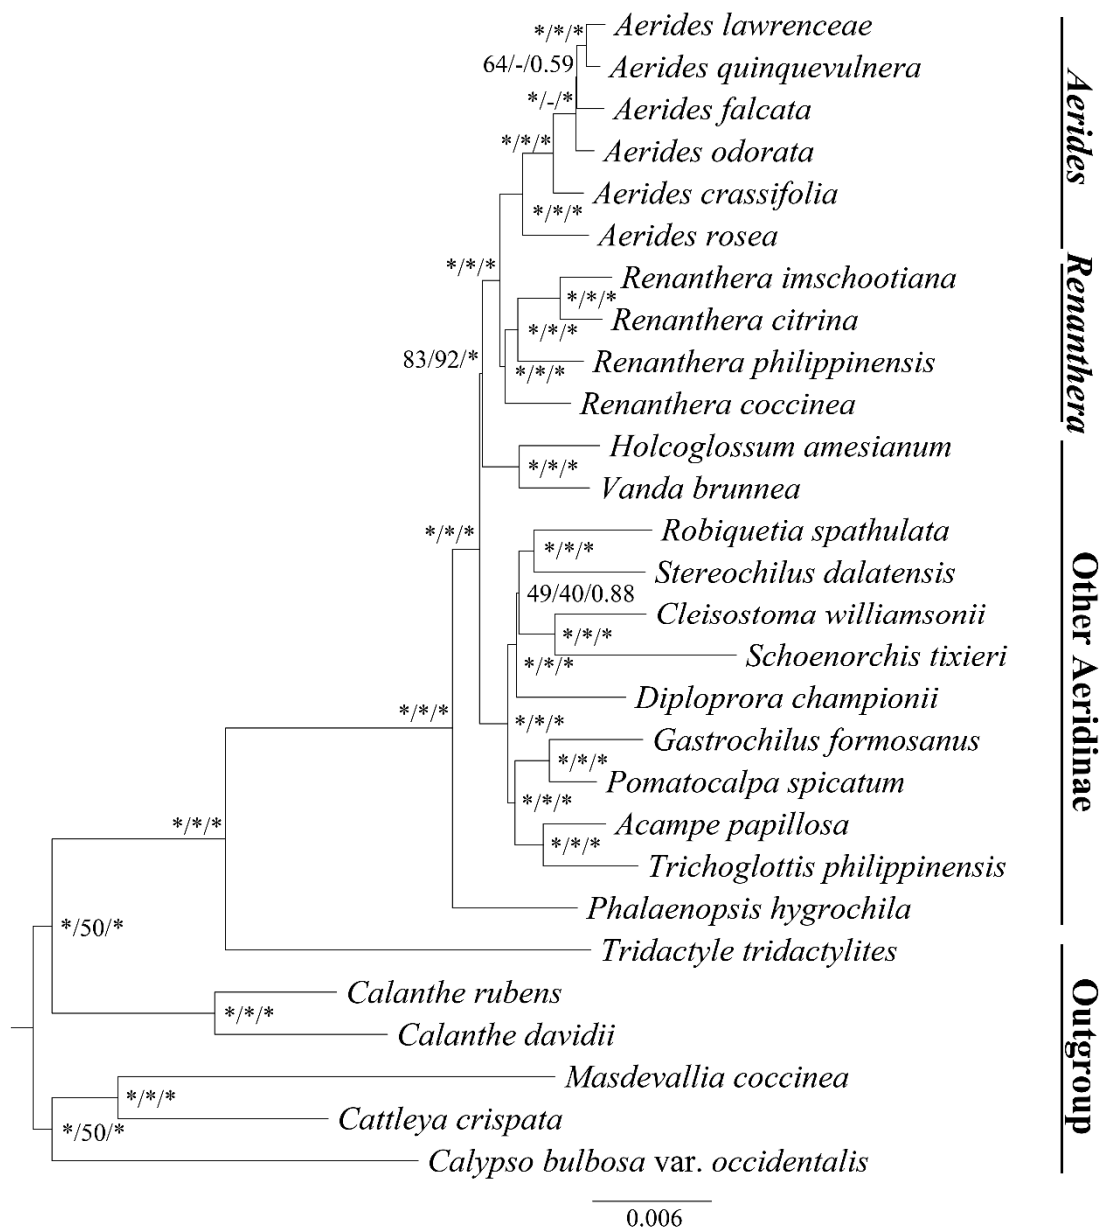

**Supplementary Figure 1.** Phylogenetic analysis of 22 Aeridinae species based on 68 protein coding genes. Numbers near the nodes are bootstrap percentages and Bayesian posterior probabilities (BSML left, BSMP middle, and PP right). - indicates that a node is inconsistent between the topology of the MP/ML trees and the Bayesian tree. \* indicates that the node is 100 bootstrap percentage or 1.00 posterior probability.

**Supplementary Table 1** Source and voucher information for this study. Voucher specimens were deposited in the herbariums of Forestry College of Fujian Agriculture and Forestry University (FJFC) and National Center for Biotechnology Information (NCBI).

| Species                                         | Source                 | Voucher    | GenBank accession numbers |
|-------------------------------------------------|------------------------|------------|---------------------------|
| <i>Aerides lawrenceae</i> .                     | This study             |            | OR159898                  |
| <i>Aerides odorata</i>                          | This study             |            | OR159899                  |
| <i>Aerides quinquevulnera</i> .                 | This study             |            | OR159900                  |
| <i>Aerides crassifolia</i>                      | This study             |            | OR159897                  |
| <i>Aerides falcata</i>                          | This study             |            | OR159896                  |
| <i>Aerides rosea</i> .                          | This study             |            | OR159901                  |
| <i>Acampe papillosa</i>                         | Liu et al., 2020       | Liu3246    | MN124418                  |
| <i>Cleisostoma williamsonii</i>                 | Liu et al., 2020       | Liu4525    | MN124426                  |
| <i>Diploprora championii</i>                    | Liu et al., 2020       | Liu4480    | MN124409                  |
| <i>Gastrochilus formosanus</i>                  | Liu et al., 2020       | Liu4265    | MN124435                  |
| <i>Holcoglossum amesianum</i>                   | Li et al., 2019        | 9419       | NC041511                  |
| <i>Phalaenopsis hygrophila</i>                  | Liu et al., 2020       | Liu3336    | MN124430                  |
| <i>Pomatocalpa spicatum</i>                     | Liu et al., 2020       | Liu4589    | MN124411                  |
| <i>Renanthera citrina</i>                       | Zhang et al., 2021     | OR-001     | OK377033                  |
| <i>Renanthera coccinea</i>                      | Zhang et al., 2021     | OR-002     | OK377034                  |
| <i>Renanthera imschootiana</i>                  | Zhang et al., 2021     | OR-003     | OK377035                  |
| <i>Renanthera philippinensis</i>                | Zhang et al., 2021     | OR-004     | OK377036                  |
| <i>Robiquetia spathulata</i>                    | Liu et al., 2020       | Liu5248    | MN124410                  |
| <i>Schoenorchis tixieri</i>                     | Liu et al., 2020       | Liu4123    | MN124407                  |
| <i>Stereochilus dalatensis</i>                  | Liu et al., 2020       | Lior003    | MN124431                  |
| <i>Trichoglottis philippinensis</i>             | Liu et al., 2020       | Lior075    | MN124404                  |
| <i>Vanda brunnea</i>                            | Li et al., 2019        | 13059      | NC041522                  |
| <b>Outgroup</b>                                 |                        |            |                           |
| <i>Calanthe davidii</i>                         | Dong et al., 2018      | -          | MG925365                  |
| <i>Calanthe triplicata</i>                      | Yang et al., 2014      | -          | KF753635                  |
| <i>Calypso bulbosa</i> var. <i>occidentalis</i> | Barrett et al., 2018   | CFB 349 OR | MG874037                  |
| <i>Cattleya crispata</i>                        | da Rocha et al., 2016  | -          | KP168671                  |
| <i>Masdevallia coccinea</i>                     | Kim et al., 2015       | -          | KP205432                  |
| <i>Tridactyle tridactylites</i>                 | D'hajjère et al., 2022 | -          | MW760855                  |

**Supplementary Table 2.** The details information of long repeats.

| seq len | species    | <i>A. crassifolia</i> | <i>A. falcata</i> | <i>A. lawrenceae</i> | <i>A. odorata</i> | <i>A. quinquevulnera</i> | <i>A. rosea</i> |
|---------|------------|-----------------------|-------------------|----------------------|-------------------|--------------------------|-----------------|
| 40+     | Complement | 0                     | 0                 | 0                    | 0                 | 0                        | 0               |
|         | Forward    | 2                     | 0                 | 0                    | 1                 | 4                        | 10              |
|         | Palindrome | 3                     | 4                 | 5                    | 4                 | 4                        | 15              |
|         | Reverse    | 0                     | 1                 | 1                    | 1                 | 0                        | 0               |
| 30-39   | Forward    | 3                     | 4                 | 4                    | 6                 | 4                        | 7               |
|         | Palindrome | 9                     | 11                | 9                    | 9                 | 7                        | 11              |
|         | Reverse    | 1                     | 2                 | 7                    | 3                 | 2                        | 3               |
|         | Complement | 2                     | 0                 | 0                    | 0                 | 0                        | 0               |
| 20-29   | Forward    | 17                    | 10                | 9                    | 11                | 13                       | 1               |
|         | Palindrome | 16                    | 12                | 12                   | 9                 | 12                       | 1               |
|         | Reverse    | 11                    | 5                 | 1                    | 3                 | 3                        | 1               |

**Supplementary Table 3.** The details information Small simple repeats.

| species                       | mono | di | tri | tetra | penta | hexa | total |
|-------------------------------|------|----|-----|-------|-------|------|-------|
| <i>Aerides crassifolia</i>    | 51   | 10 | 4   | 3     | 1     | 2    | 71    |
| <i>Aerides falcata</i>        | 52   | 10 | 7   | 3     | 1     | 1    | 74    |
| <i>Aerides lawrenceae</i>     | 47   | 11 | 9   | 5     | 3     | 1    | 76    |
| <i>Aerides odorata</i>        | 51   | 10 | 6   | 3     | 1     | 1    | 72    |
| <i>Aerides quinquevulnera</i> | 50   | 9  | 8   | 3     | 3     | 1    | 74    |
| <i>Aerides rosea</i>          | 53   | 12 | 6   | 4     | 2     | 0    | 77    |

| species                       | LSC | SSC | IR | total |
|-------------------------------|-----|-----|----|-------|
| <i>Aerides crassifolia</i>    | 49  | 14  | 8  | 71    |
| <i>Aerides falcata</i>        | 53  | 13  | 8  | 74    |
| <i>Aerides lawrenceae</i>     | 48  | 20  | 8  | 76    |
| <i>Aerides odorata</i>        | 46  | 20  | 6  | 72    |
| <i>Aerides quinquevulnera</i> | 47  | 17  | 10 | 74    |
| <i>Aerides rosea</i>          | 54  | 15  | 8  | 77    |

**Supplementary Table 4.** The nucleotide diversity of six *Aerides* plastome.

**Supplementary Table 5.** The nucleotide diversity of 68 protein coding genes in *Aerides*.
