# Supplementary figures and images for: Comparative Phylogenetic Analysis for Aerides (Aeridinae, Orchidaceae) Based on Six Complete Plastid Genomes
Source: MDPI journal article supplement (doi:10.3390/ijms241512473), 2023-08-05

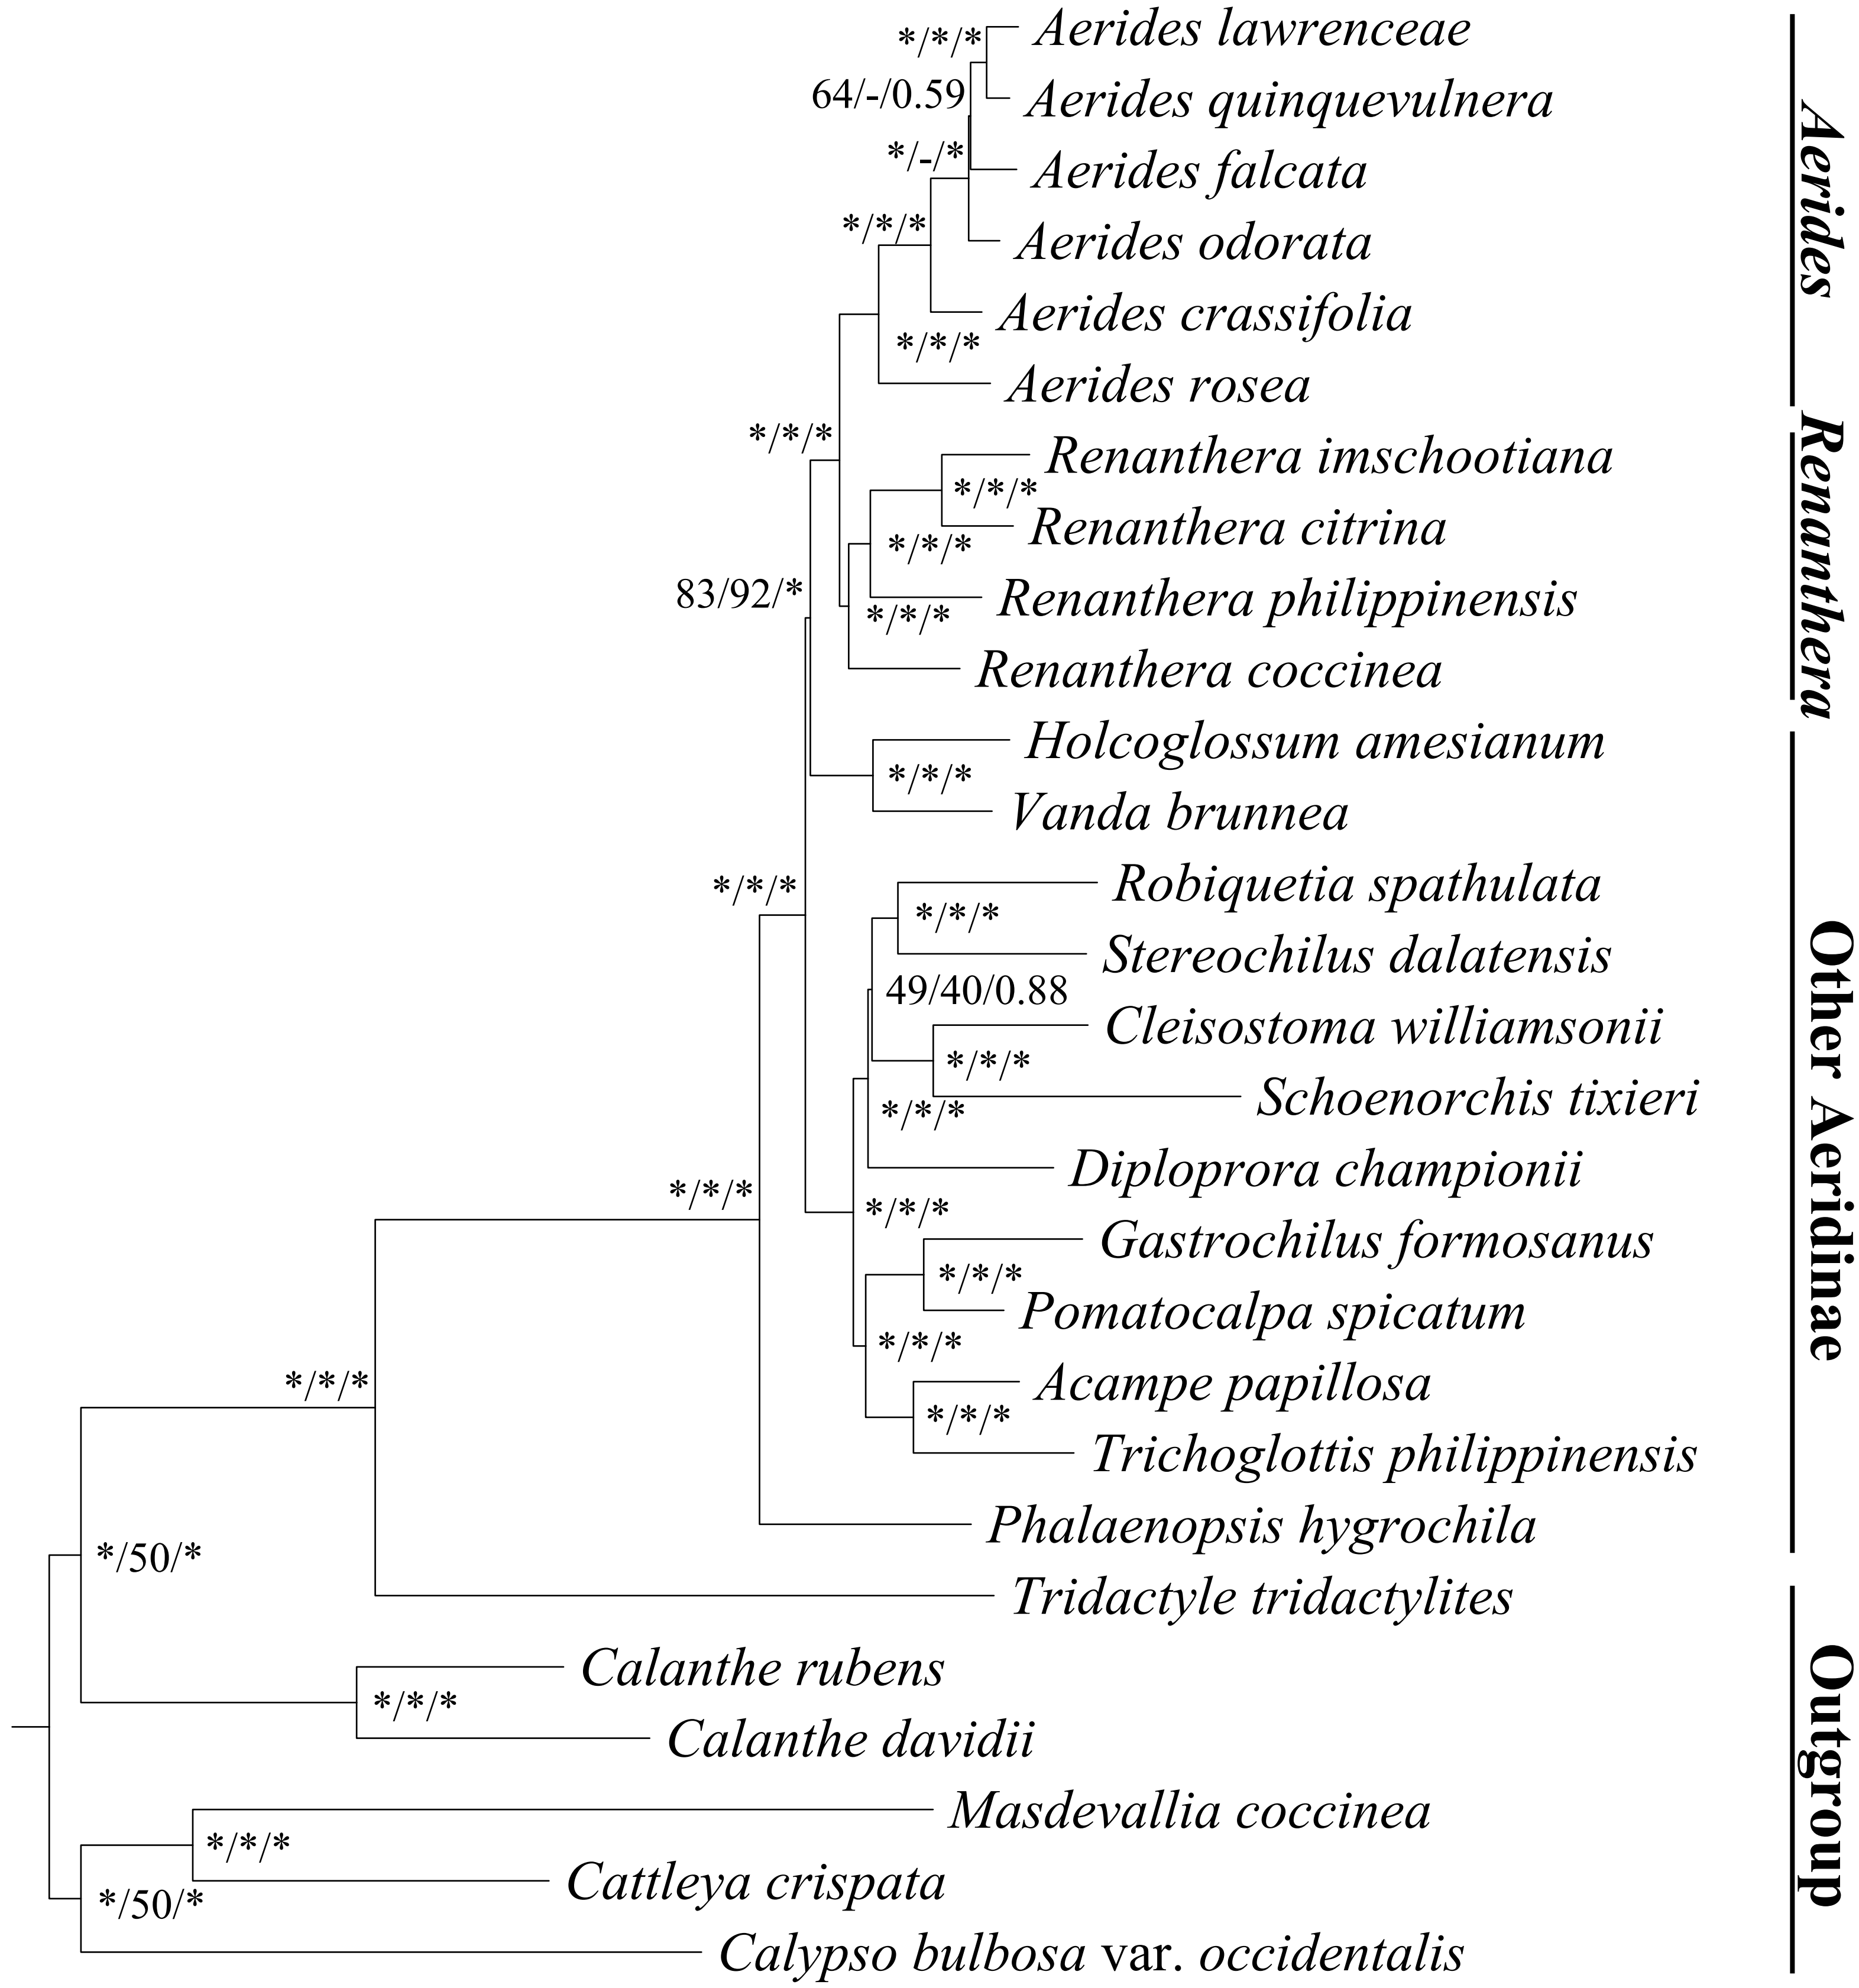

0.006

Supplement: s1 [file s1]
